# Supplementary material for: Response of the Urothelial Carcinoma Cell Lines to Cisplatin
Source: MDPI journal article supplement (doi:10.3390/ijms232012488), 2022-10-18
Supplement: s1 [file s1]

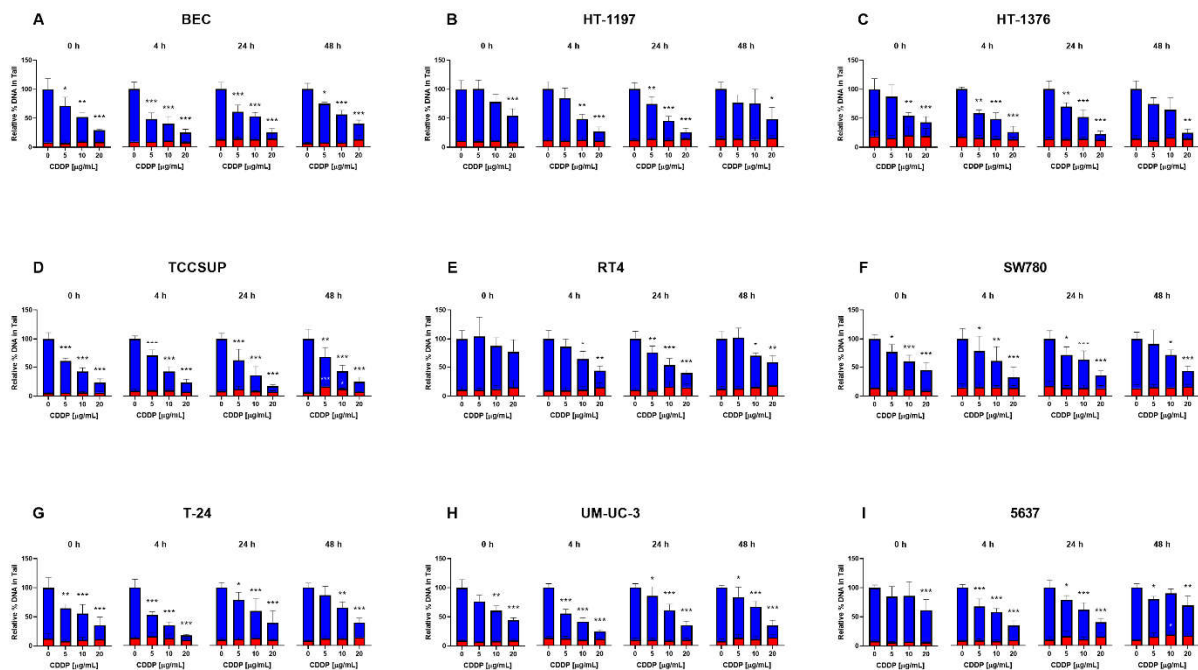

**Figure S1.** DNA damage induction and repair in the UCC lines and BEC after CDDP treatment. BEC (A), HT-1197 (B), HT-1376 (C), TCCSUP (D), RT4 (E), SW780 (F), T-24 (G), UM-UC-3 (H) a 5637 (I). Blue columns represent CDDP treatment followed by SO addition, while the red ones depict CDDP treatment only. Black asterisk shows statistical significance against SO-treated control (0  $\mu\text{g/mL}$ , blue columns), while white asterisk shows statistical significance against CDDP-treated control (0  $\mu\text{g/mL}$ , red columns). \* $p < 0.05$ , \*\* $p < 0.01$  and \*\*\* $p < 0.001$  (for details, see Material and Methods).

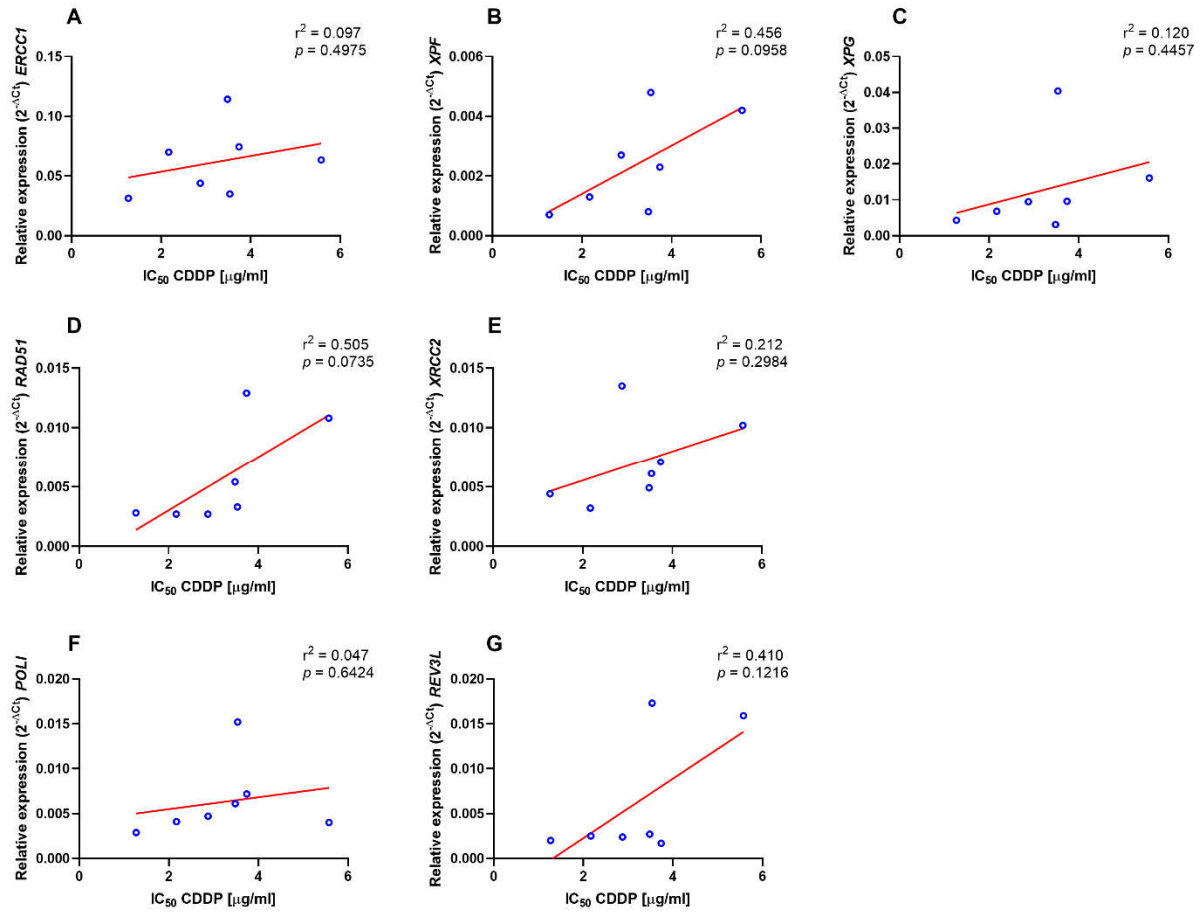

**Figure S2.** Correlation of relative basal mRNA expression of the *ERCC1* (A), *XPF* (B), *XPG* (C), *RAD51* (D), *XRCC2* (E), *POL1* (F) and *REV3L* (G) genes with IC<sub>50</sub> values of continuous 48 h CDDP treatment.

**Table S1.** List of primers used for RT-qPCR analysis.

| <b>Gene</b>   | <b>Forward (5'–3')</b>   | <b>Reverse (5'–3')</b> |
|---------------|--------------------------|------------------------|
| <i>XPA</i>    | TCACAATGGGGTGATATGAAACTC | CTGTCGGACTTCCTTTGCTTC  |
| <i>ERCC1</i>  | CTGCTTGTCCAGGTGGATG      | GCTGGTTTCTGCTCATAGGC   |
| <i>XPF</i>    | AACCTTTGTTCGGCAGCTTG     | GCGTTGTTCTCAGTTGAACC   |
| <i>XPG</i>    | CAAAGGCCGTGGAACCAATG     | TTCGCCTTGTTCTGAGGGAG   |
| <i>RAD51</i>  | AGAAGTGGAGCGTAAGCCAG     | GAAATGGGTTGTGGGCCAAAG  |
| <i>RAD51C</i> | AGTTGGGGACATGCTGCTAC     | ATTCCTTCTGGCTGGGTGAC   |
| <i>XRCC2</i>  | GTTGGTGAATGGCGTTGGTG     | TACCTTCAAGTCGGGCAAGG   |
| <i>POLH</i>   | TCGGGAACAGGTACAATGGTGG   | ATAGCGGGTAAGGGCACAGC   |
| <i>POLI</i>   | CACCAAATGCTTCATCCAGAG    | TCCTAGCTTCATAGTTGCAGG  |
| <i>REV3L</i>  | GGGTGCCAGATGACAAAATTGAG  | AGAGGGGAAAACGCTGATGAAG |
| <i>PGK</i>    | TGGAGCTCCTGGAAGGTAAAG    | AAGTTGACTTAGGGGCTGTGC  |
| <i>ACTB</i>   | GCACTCTTCCAGCCTTCCTT     | CGTACAGGTCTTTGCGGATG   |
